# Supplementary material for: Selective effects of non-thermal atmospheric plasma on triple-negative breast normal and carcinoma cells through different cell signaling pathways
Source: PubMed Central journal article supplement (PMC5554176; doi:10.1038/s41598-017-08792-3), 2017-08-11
Supplement: 41598_2017_8792_MOESM1_ESM.pdf [file 41598_2017_8792_MOESM1_ESM.pdf]

## Supplemental Material

### Selective effects of non-thermal atmospheric plasma on triple-negative breast normal and carcinoma cells through different cell signaling pathways

Yuan Liu<sup>1</sup>, Sheng Tan<sup>2,3</sup>, Hao Zhang<sup>1</sup>, Xiangjun Kong<sup>2,3</sup>, Lili Ding<sup>1</sup>, Jie Shen<sup>4</sup>, Yan  
Lan<sup>4</sup>, Cheng Cheng<sup>4\*</sup>, Tao Zhu<sup>2,3\*</sup> and Weidong Xia<sup>1\*</sup>

<sup>1</sup>School of Life Science, University of Science and Technology of China, Hefei,  
Anhui 230027, China

<sup>2</sup>The CAS Key Laboratory of Innate Immunity and Chronic Disease, School of Life  
Sciences, University of Science and Technology of China, Hefei, Anhui 230027,  
China

<sup>3</sup>Hefei National Laboratory for Physical Sciences at Microscale, Hefei, Anhui 230027,  
China

<sup>4</sup> Institute of Plasma Physics, Chinese Academy of Sciences, P. O. Box 1126, Hefei  
230031, P. R. China

E-mail: [chengcheng@ipp.ac.cn](mailto:chengcheng@ipp.ac.cn) (C Cheng); [zhut@ustc.edu.cn](mailto:zhut@ustc.edu.cn) (T Zhu);  
[xiawd@ustc.edu.cn](mailto:xiawd@ustc.edu.cn) (WD Xia)

**Figure S1. Full-length gels/blots of Figure 3.**

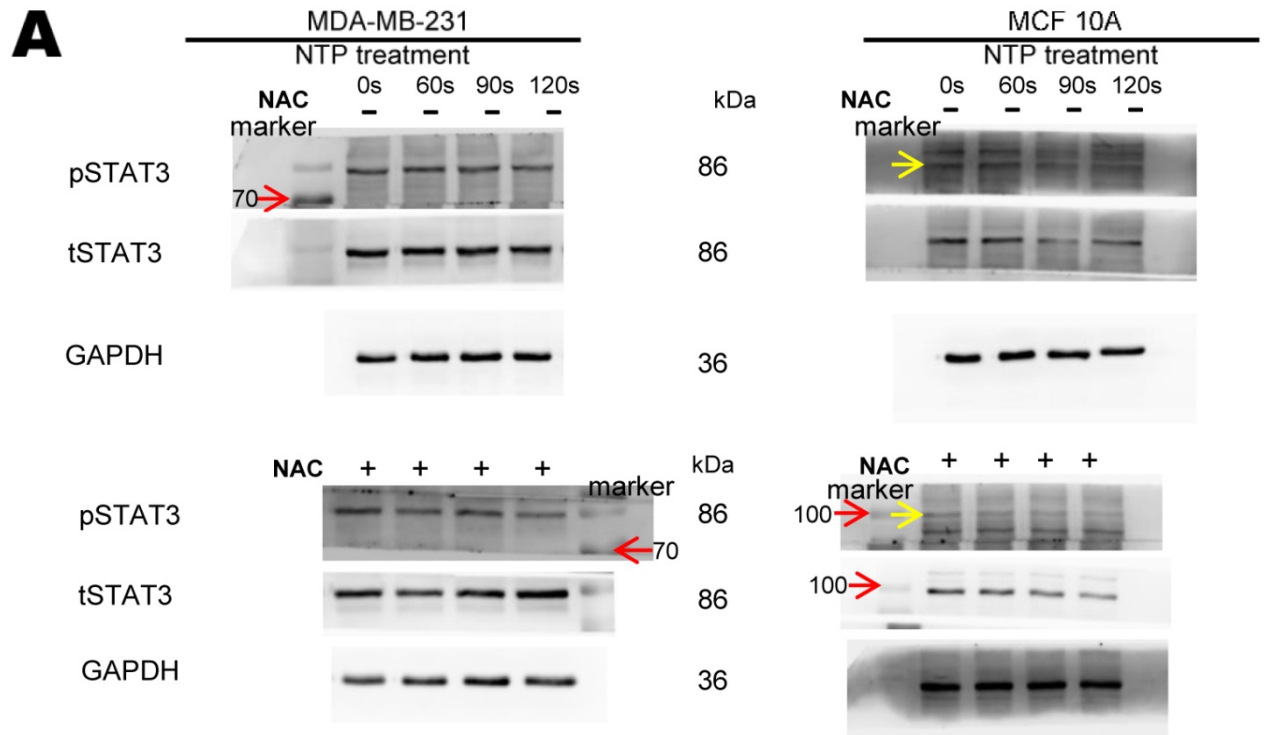

**Figure S2. Effects of NTP on the expression of pSTAT3 and tSTAT3 in MDA-MB-453 cells.**

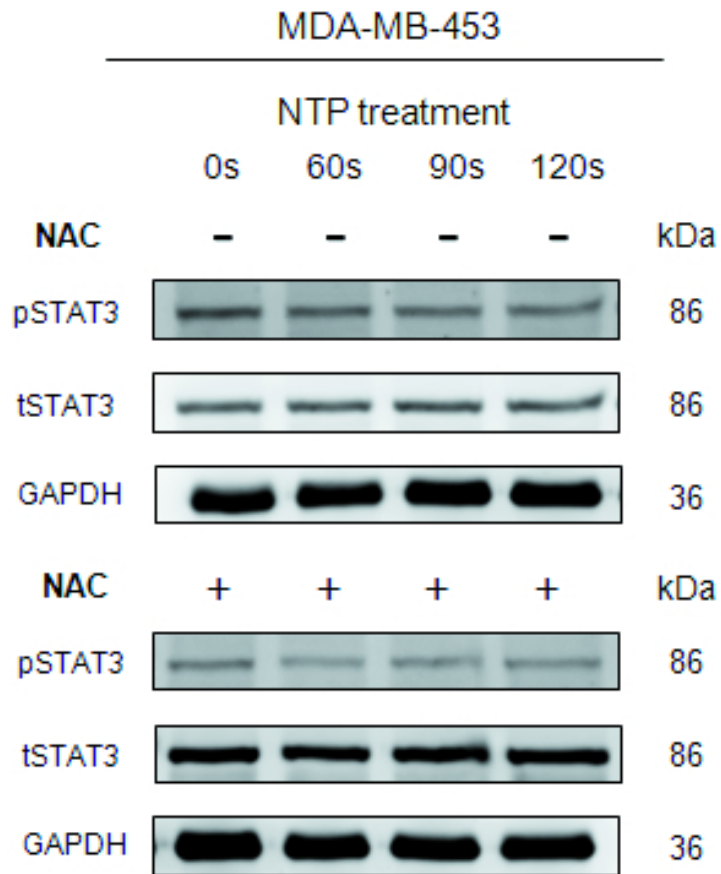

All cells were exposed to NTP for 0, 60, 90 or 120 s. After forty-eight hours post-treated with 5 mM N-acetyl cysteine (NAC+) or without (NAC-), proteins from total cell lysates were harvested. The expressions of pSTAT3 and STAT3 in MDA-MB-453 cells were detected by Western blot analysis. GAPDH was taken as a loading control throughout.

Figure S3. H<sub>2</sub>O<sub>2</sub> effects on cells with or without ROS scavenger.

A

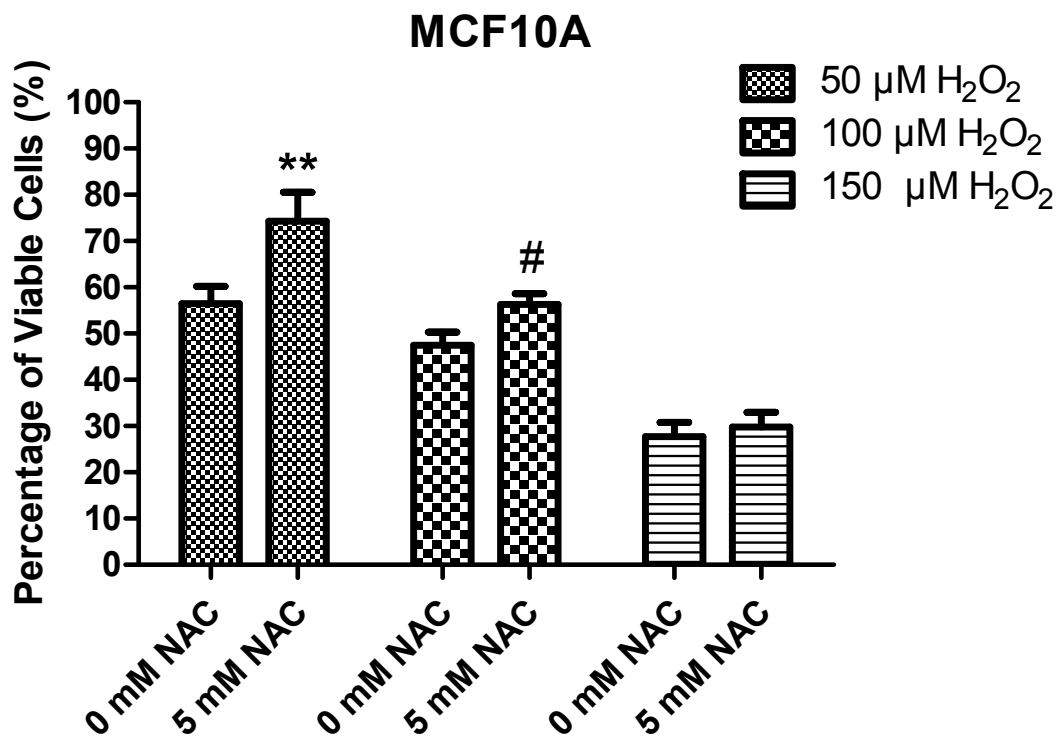

A. MCF10A cells were treated with : 50 μM H<sub>2</sub>O<sub>2</sub>, 100 μM H<sub>2</sub>O<sub>2</sub>, 150 μM H<sub>2</sub>O<sub>2</sub>, and with 0 mM or 5 mM NAC. After forty-eight hours, cell numbers of each dish were counted by an automatic analyzer CountStar. All experiments were replicated a minimum of three times. Data are presented as means ± S.D. and statistical analysis was carried out using one-way ANOVA with Tukey's multiple comparison test (\*p<0.05, \*\*p< 0.01, #p< 0.05 versus control).

B

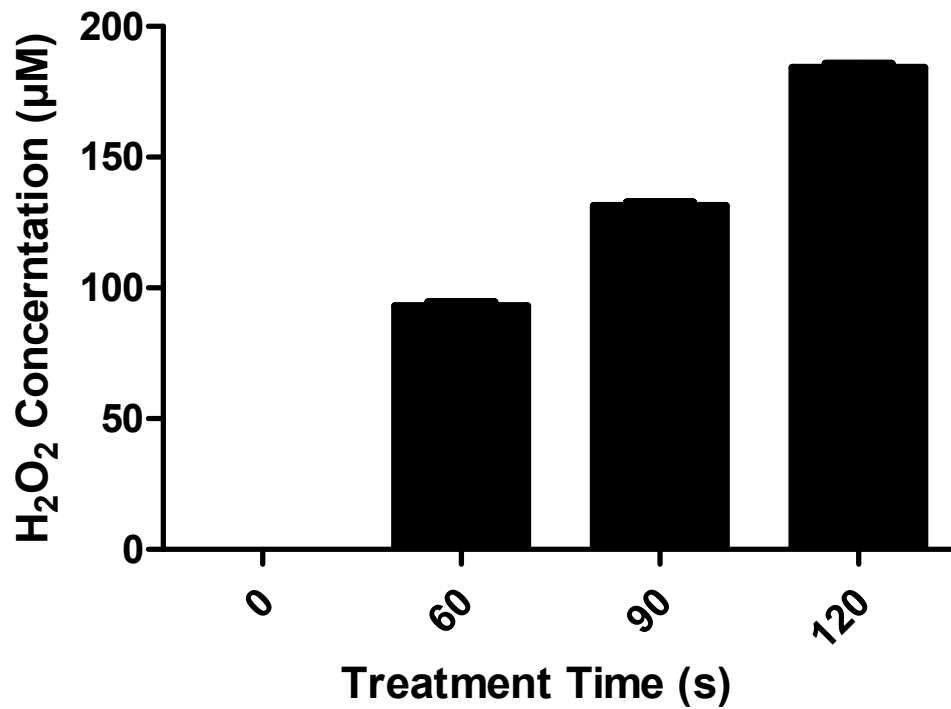

B. H<sub>2</sub>O<sub>2</sub> concentration of the NTP treated medium. The H<sub>2</sub>O<sub>2</sub> concentration of the NTP treated medium was measured after 60 s, 90 s and 120 s NTP treatment (The test kits was 18789 respectively and the test methods were according to the manufacturer's instructions).

C

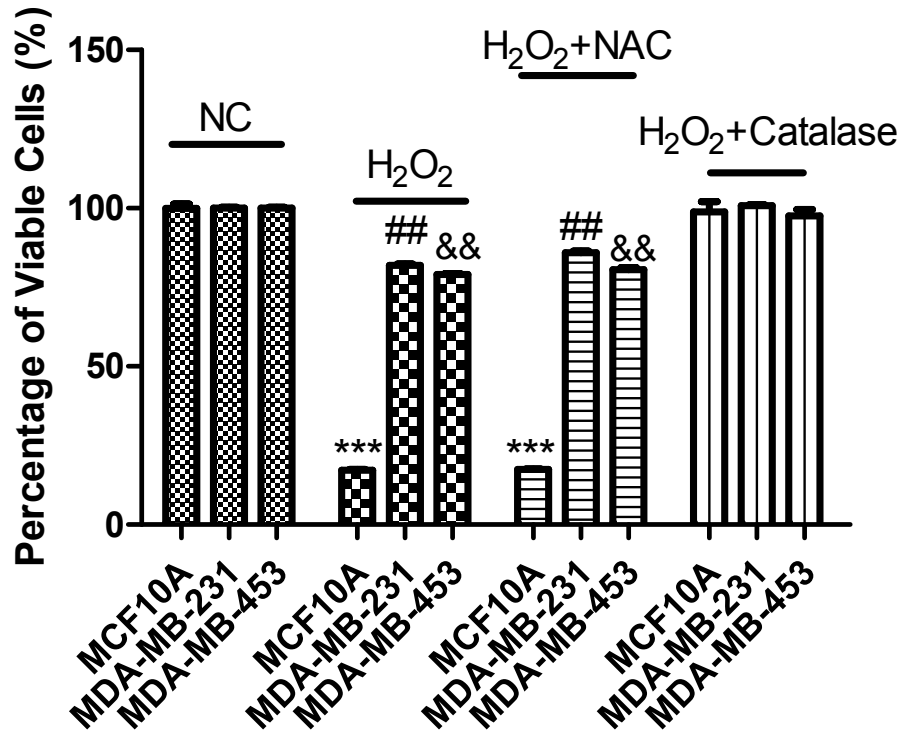

C. All cells were treated with : Negative control (NC), 185  $\mu$ M H<sub>2</sub>O<sub>2</sub> (H<sub>2</sub>O<sub>2</sub>), 185  $\mu$ M H<sub>2</sub>O<sub>2</sub> and 5mM NAC (H<sub>2</sub>O<sub>2</sub>+NAC), 185  $\mu$ M H<sub>2</sub>O<sub>2</sub> and 500 U/ml catalase (H<sub>2</sub>O<sub>2</sub>+Catalase). After forty-eight hours, cell numbers of each dish were counted by an automatic analyzer CountStar. All experiments were replicated a minimum of three times. Data are presented as means  $\pm$  S.D. and statistical analysis was carried out using one-way ANOVA with Tukey's multiple comparison test (\*p<0.05, \*\*p< 0.01, \*\*\*p< 0.001, ##p< 0.01, &&p< 0.01, versus control).

D

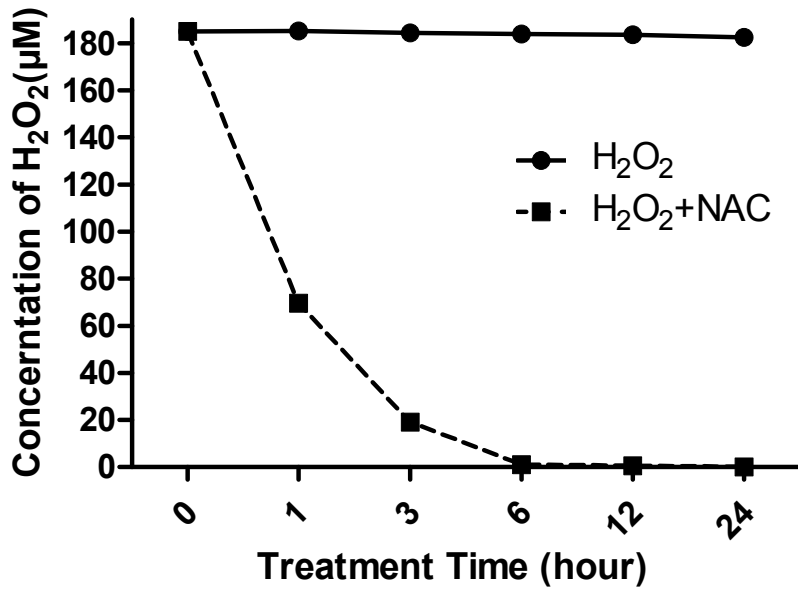

D. The concentration change of 185 µM H<sub>2</sub>O<sub>2</sub> with 5 mM NAC. 185 µM H<sub>2</sub>O<sub>2</sub> and 185 µM H<sub>2</sub>O<sub>2</sub> with 5 mM NAC were dissolved in 1×PBS and incubated at 37 °C incubator. The concentration of H<sub>2</sub>O<sub>2</sub> was measured at 0 h, 1 h, 3 h, 6 h, 12 h and 24 h by H<sub>2</sub>O<sub>2</sub> Quantitative Assay Kit (Sangon Biotech, China). Data are presented as means ± S.D. for three independent experiments.

**Figure S4. Full-length gels/blots of Figure 5C.**

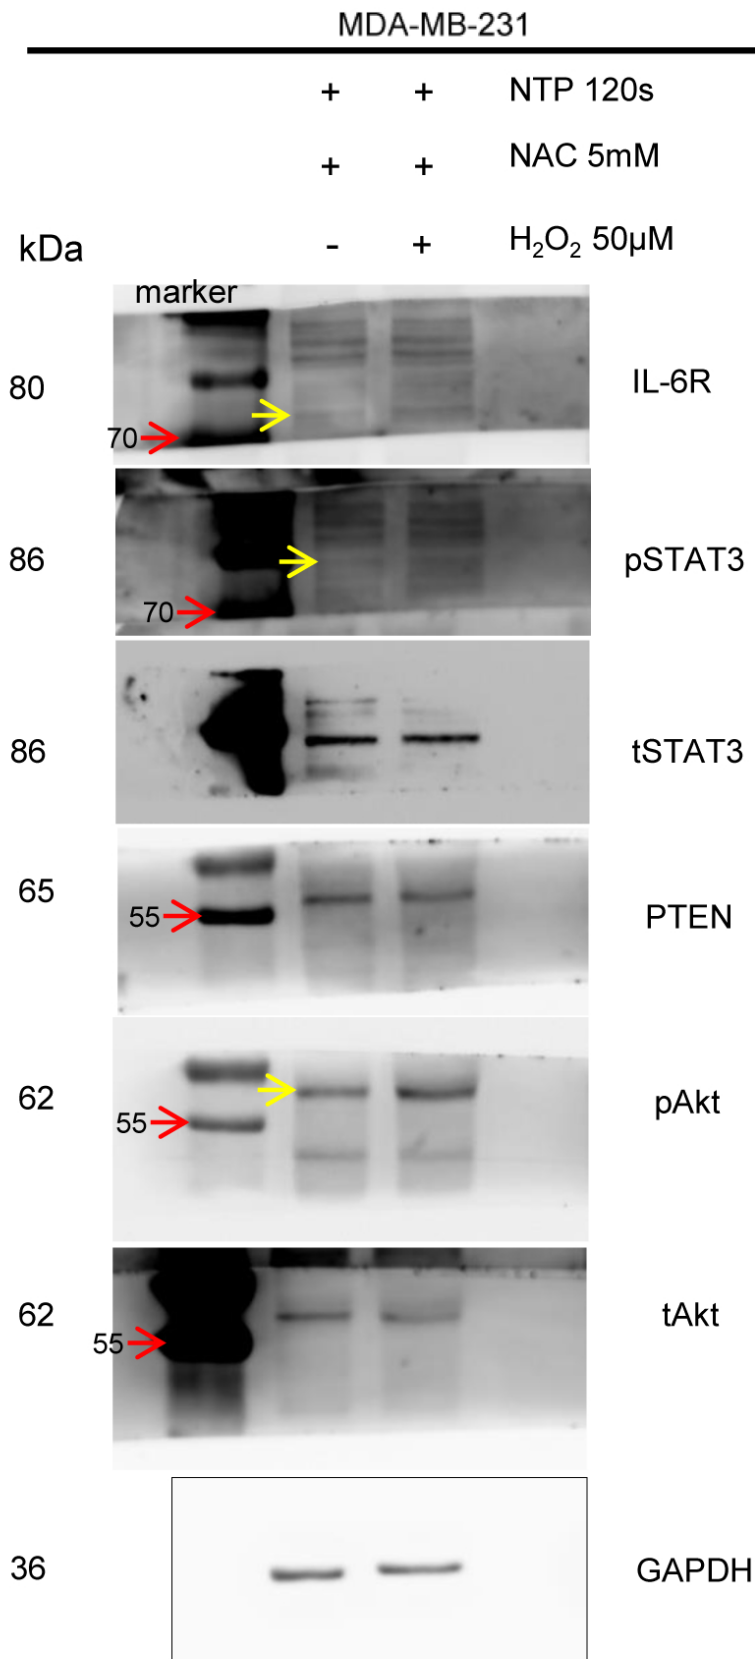



**Figure S5. Full-length gels/blots of Figure 6.**

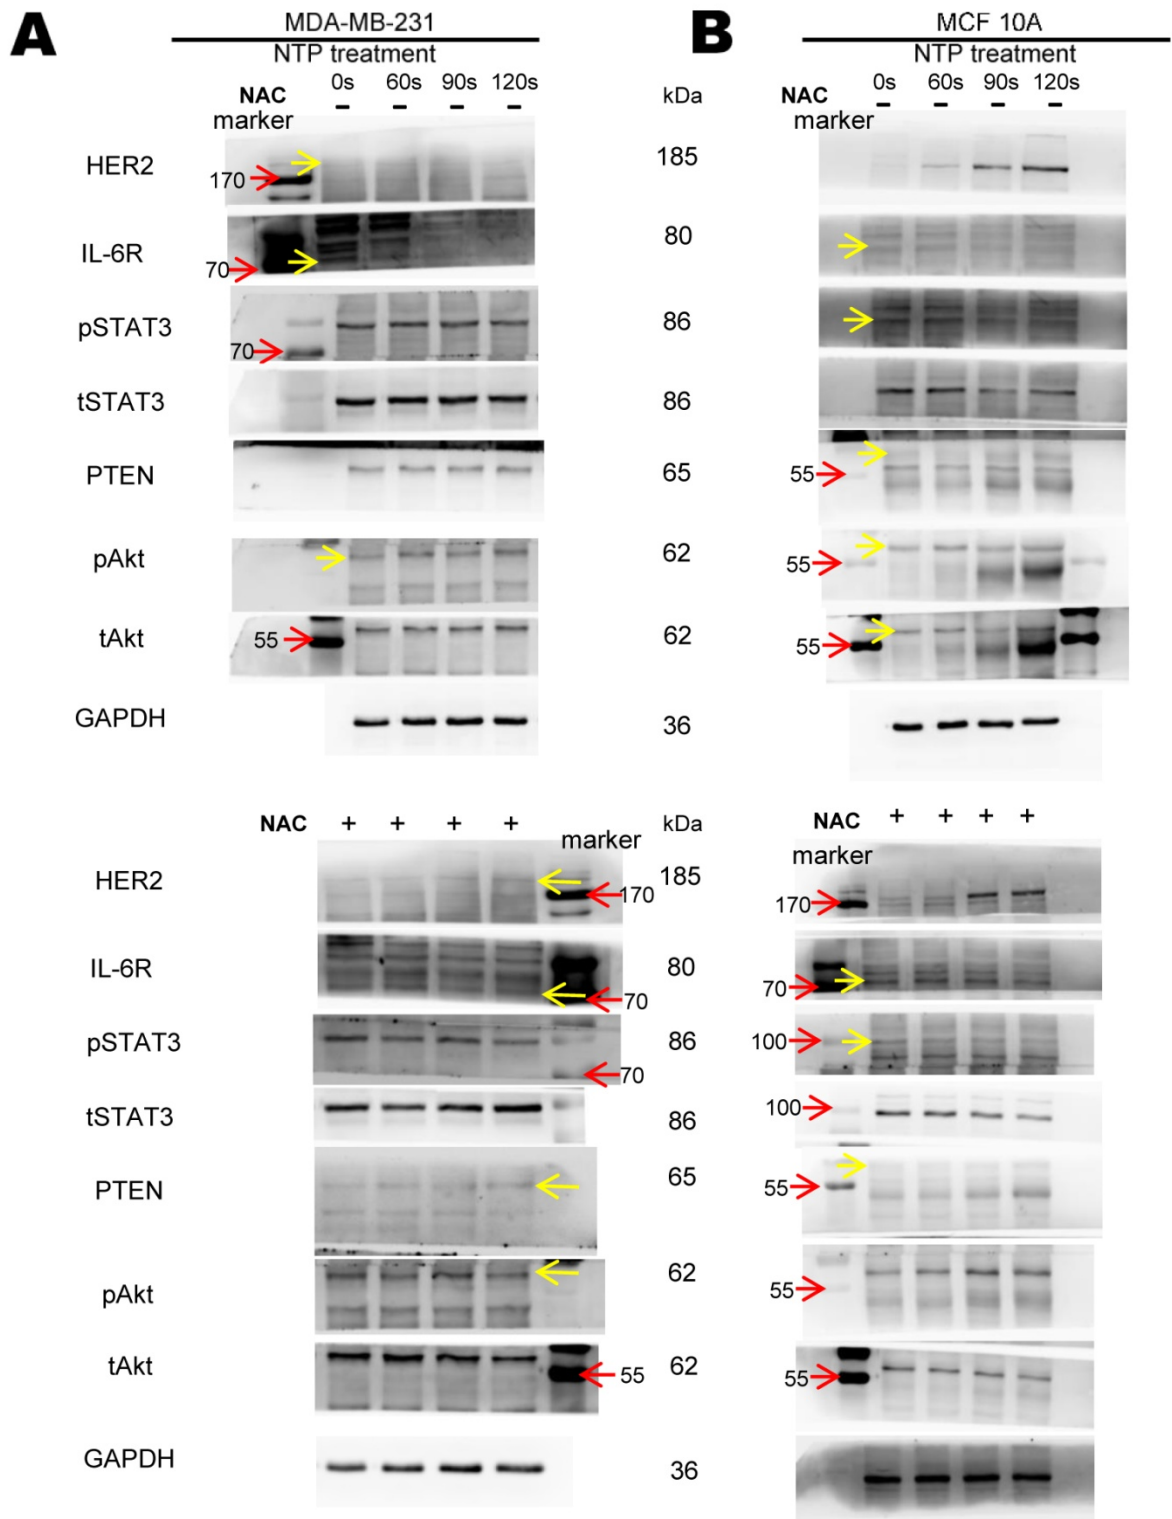

Figure S6. ROS scavenger cytotoxicity test.

A

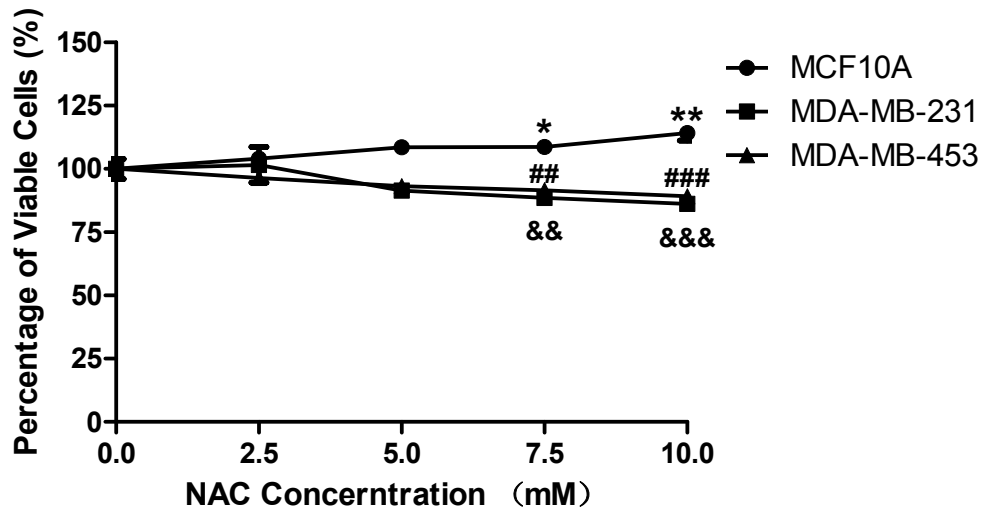

A. All cells were treated with 0mM, 2.5 mM, 5 mM, 7.5 mM, 10 mM NAC. After forty-eight hours, cell numbers of each dish were counted by an automatic analyzer CountStar. All experiments were replicated a minimum of three times. Data are presented as means  $\pm$  S.D. and statistical analysis was carried out using one-way ANOVA with Tukey's multiple comparison test (\* $p < 0.05$ , \*\* $p < 0.01$ , \*\*\* $p < 0.001$ , ## $p < 0.01$ , ### $p < 0.001$ , && $p < 0.01$ , &&& $p < 0.001$  versus control). Each data were compared with relevant 0mM NAC treatment group data.

B

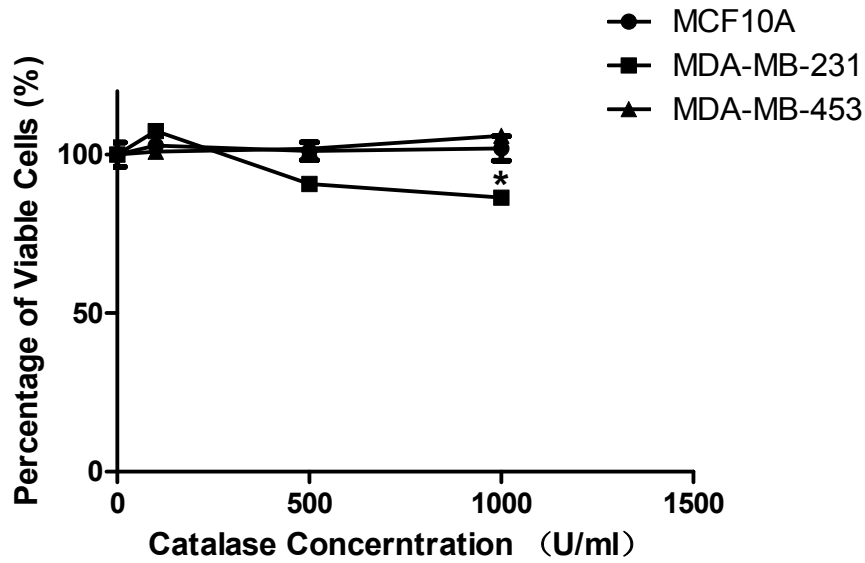

B. All cells were treated with 0 U/ml, 100 U/ml, 500 U/ml, 1000 U/ml catalase. After forty-eight hours, cell numbers of each dish were counted by an automatic analyzer CountStar. All experiments were replicated a minimum of three times. Data are presented as means  $\pm$  S.D. and statistical analysis was carried out using one-way ANOVA with Tukey's multiple comparison test (\* $p < 0.05$  versus control).
